# Supplementary material
Source: Springer Nature journal article supplement (https://www.springermedizin.de/resource/supplementary/12874_2013_955_MOESM7_ESM.pdf/9433212)

Optimal EWMA fixed control limits for GARCH model residuals

Raw mortality

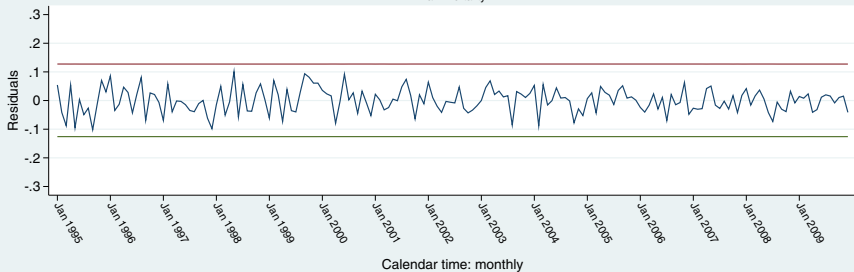

Optimal EWMA fixed control limits for multiplicative seasonal ARMA residuals

Expected mortality

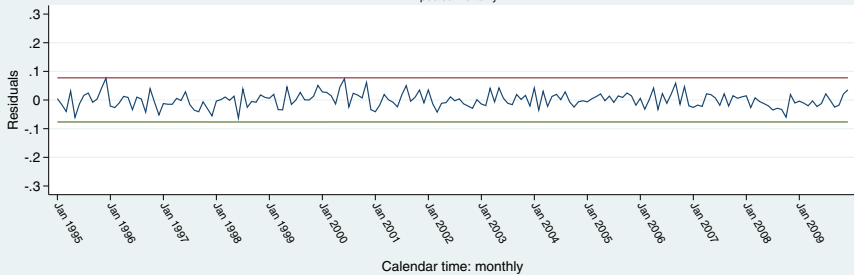

Supplement: MOESM7 [file 9433212]
